# Supplementary material for: Effect of a Novel Intervention Targeting Appetitive Traits on Body Mass Index Among Adults With Overweight or Obesity: A Randomized Clinical Trial
Source: PubMed Central journal article supplement (PMC9118075; doi:10.1001/jamanetworkopen.2022.12354), 2022-05-18
Supplement: jamanetwopen-e2212354-s00.pdf [file jamanetwopen-e2212354-s00.pdf]

## Data Sharing Statement

Boutelle. Effect of a Novel Intervention Targeting Appetitive Traits on Body Mass Index Among Adults With Overweight or Obesity. *JAMA Netw Open*. Published May 18, 2022.

doi:10.1001/jamanetworkopen.2022.12354

### Data

**Data available:** Yes

**Data types:** Deidentified participant data

**How to access data:** [Kboutelle@health.ucsd.edu](mailto:Kboutelle@health.ucsd.edu)

**When available:** With publication

### Supporting Documents

**Document types:** None

### Additional Information

**Who can access the data:** Researchers whose proposed use of the data has been approved

**Types of analyses:** Secondary analyses approved by the research team

**Mechanisms of data availability:** After approval of a proposal
